# Supplementary material for: Bioinspired Self-Shaping Clay Composites for Sustainable Development
Source: MDPI journal article supplement (doi:10.3390/biomimetics7010013), 2022-01-10
Supplement: s1 [file s1]

# Bioinspired Self-Shaping Clay Composites for Sustainable Development

Yuxiang Zhang<sup>1</sup> and Hortense Le Ferrand<sup>2,\*</sup>

<sup>1</sup> Queen Mary Engineering School, Northwestern Polytechnical University, 710072, Xi'an, China;  
yuxiang.zhang@se18.qmul.ac.uk

<sup>2</sup> School of Mechanical and Aerospace Engineering, Nanyang Technological University, Singapore 639798,  
Singapore

\* Correspondence: hortense@ntu.edu.sg

This file contains a protocol to produce bioinspired self-shaping objects from local clay, hydrogel, and plant materials.

## 1. Materials and Utensils

The following ingredients are required, in quantities relative to the intended dimensions of the products to fabricate:

- Clay
- Water
- Starch powder
- Fiber-rich plant such as celery

The utensils to be used are:

- A plastic foil, textile or similar. The foil will be used as a substrate to roll the material and should be easy to remove.
- A rolling pin and rollers. The thickness of the rollers should be the thickness of the desired layer, typically of less than 3 mm.
- A measuring beaker. A balance, measuring spoons, or similar, can also be used.
- A recipient for mixing the ingredients.
- A heater up to 100 °C.
- (optional) a drying oven with controllable temperature up to 100 °C.
